# Supplementary material for: SepF supports the recruitment of the DNA translocase SftA to the Z‐ring
Source: PubMed Central journal article supplement — Mol Microbiol. 2022 Apr 30;117(5):1263–74. doi: 10.1111/mmi.14906 (PMC9320952; doi:10.1111/mmi.14906), 2022-04-30
Supplement: MMI-117-1263-s001.pdf [file MMI-117-1263-s001.pdf]

1 **SUPPLEMENTARY INFORMATION**

2  
3 **SepF supports the recruitment of the DNA translocase SftA to the Z-ring**

4  
5  
6 Terrens N. V. Saaki, Zihao Teng, Michaela Wenzel, Magali Ventroux, Rut Carballido-López,  
7 Marie Francoise Noirot-Gros, Leendert W. Hamoen

8  
9  
10 **Content:**

- 11 • General bacterial growth conditions
- 12 • Plasmid and strain construction
- 13 • Table S1: Strains used in this study
- 14 • Table S2: Plasmids used in this study
- 15 • Table S3: Primers used in this study
- 16 • Fig. S1 Secondary structure prediction of SftA using PSIPred
- 17 • Fig. S2: Localization of SftA in different cell division mutants
- 18 • Fig. S3: SftA recruitment does not depend on late cell division proteins
- 19 • Fig. S4: Large field microscopy images of mutants shown in Fig. 5.
- 20 • Fig. S5: SftA inhibits SepF ring formation
- 21 • Fig. S6: Assembly of FtsZ-rings over nucleoids
- 22 • References

## 25 **General bacterial growth conditions**

26 *E. coli* strain TOP10 was used for the construction and propagation of all plasmids. All *B.*  
27 *subtilis* strains were derived from strain 168ca *trpC2* (Zeigler *et al.*, 2008). Strains were grown  
28 at 37 °C in Lysogeny broth (LB) medium supplemented with antibiotics. For transformation,  
29 *B. subtilis* was grown in minimal medium as described before (Hamoen *et al.*, 2006). Antibiotic  
30 concentrations used were 100 µg/ml ampicillin, 5 µg/ml chloramphenicol, 5 µg/ml  
31 kanamycin, 10 µg/ml tetracycline, 2 µg/ml phleomycin and 2 µg/ml erythromycin.

32 The PSIPRED secondary structure prediction method was used to predict secondary  
33 structures in the SftA sequences (Jones, 1999). Two helices were found in the first 21 amino  
34 acids sequence and Amphipaseek predicts the first one likely to be an amphipathic helix.

35

## 36 **Plasmid and strain construction**

37 Strains and plasmids used are listed in table S1 and S2, respectively. Relevant primers used  
38 for cloning are shown in table S3. For cloning, either classical restriction or Gibson Assembly  
39 was used (Gibson *et al.*, 2009). The deletion mutants of *sftA* (BKE29805, BKK29805) were  
40 acquired from the Bacillus genomic stock centre (Koo *et al.*, 2017). Chromosomal DNA of  
41 these strains was transformed into wild type *B. subtilis* 168 to achieve strains TNVS083  
42 (*sftA::erm*) and TNVS825 (*sftA::kan*), respectively.

43 To localize SftA, YdeL and PsdS, we constructed strains TNVS455, TNVS366 and  
44 TNVS810, respectively. To this end, the *sftA* gene was amplified with primers TerS279 and  
45 TerS280 from *B. subtilis* 168 genomic DNA and Gibson assembled into plasmid pMW1 (Müller  
46 *et al.*, 2016), linearized with primer pairs TerS153/TerS274, resulting in plasmid pTNV144  
47 (*Pxyl-sftA-msfGFP*). This placed the *sftA-msfGFP* reporter under control of the xylose-  
48 inducible *Pxyl* promoter. The primers added an affinity tag of 6 histidines to allow future  
49 pulldown experiments, but this was not used in this manuscript. Next, plasmid pTNV144 was

50 transformed into TNVS83, resulting in strain TNVS455 (*sftA::erm P<sub>xyl</sub>-sftA-msfGFP*). The *ydeL*  
51 gene was amplified from *B. subtilis* 168 genomic DNA using primers TerS127 and TerS128.  
52 The product was inserted into the *amyE* locus integration plasmid pSG1729 (Lewis and  
53 Marston, 1999), using *XhoI* and *NotI* sites, resulting in plasmid pTNV022. Integration of  
54 plasmid pTNV022 into wild type *B. subtilis* resulted in strain TNVS042. To construct a PsdS-  
55 GFP fusion, first plasmid pTNV143 was created. The monomeric super-folder GFP variant from  
56 pTNV064 (Müller *et al.*, 2016) was amplified using primers TerS283/TerS413 and Gibson  
57 assembled into pSG1729, which was linearized with primers TerS274 and TerS414, resulting  
58 in pTNV100. This plasmid contains no unwanted additional amino acids in the multiple cloning  
59 site and can be used to tag proteins of interest at their C-termini with monomeric super folder  
60 GFP. Subsequently, pTNV100 was linearized with primers TerS484 and TerS283 and  
61 circularized using Gibson assembly, resulting in plasmid pTNV143 (*P<sub>xyl</sub>-msfGFP*). The *psdS*  
62 gene was amplified with primers TerS621 and TerS622 from *B. subtilis* 168 genomic DNA and  
63 Gibson assembled into pTNV143 linearized with primers TerS274 and TerS368. The Gibson  
64 assembly product was transformed directly into competent *B. subtilis* 168 cells, resulting in  
65 strain TNVS810 (*P<sub>xyl</sub>-psdS-msfgfp*). The fusion proteins were expressed from the xylose  
66 inducible *P<sub>xyl</sub>* promoter.

67 To test whether SftA is recruited to cell division site by the early or late cell division  
68 proteins, two strains were constructed each harbouring the mCherry-ZapA and SftA-GFP  
69 reporter fusions, and one containing IPTG-inducible *ftsZ* and the other IPTG-inducible *pbpB*.  
70 *sftA* was amplified from *B. subtilis* genomic DNA with primers TerS001 and TerS002, which  
71 adds a unique *ApaI* and *EcoRI* restriction site at each flank. Subsequently, the *ApaI* and *EcoRI*  
72 digested product was inserted into linearized pSG1154 (Lewis and Marston, 1999), resulting  
73 in plasmid pTNV001. This plasmid was transformed into competent *B. subtilis* 168 cells,  
74 resulting in strain TNVS001 (*P<sub>xyl</sub>-sftA-gfp*). To simultaneously express mCherry-ZapA and

75 SftA-GFP, competent cells of strain EKB36 (*zapA::Pxyl-mCherry-zapA*, kind gift from Edward  
76 de Koning) was transformed with chromosomal DNA from strain TNVS001 (*Pxyl-sftA-gfp*),  
77 resulting in strain TNVS353. To tightly control the expression of FtsZ and PbpB from the IPTG-  
78 inducible *Pspac* promoter, an extra copy of the LacI repressor from strain DS7996 (*lacA::lacI*)  
79 (Pozsgai *et al.*, 2011) was introduced into *B. subtilis* strain 168, resulting in strain TNVS209.  
80 Chromosomal DNA of TNVS209 was used to transform competent cells of strain TNVS353  
81 resulting in strain TNVS758. Inducible FtsZ was acquired by transforming chromosomal DNA  
82 of strain 1801 (*ftsZ::Pspac-ftsZ*) (Marston *et al.*, 1998) into competent TNVS758, resulting in  
83 strain TNVS786. To obtain the IPTG inducible PbpB strain, chromosomal DNA of strain 3294  
84 (*chr::PdivIVA-gfp-divIVA Pspac-pbpB*) (Hamoen and Errington, 2003) was first transformed to  
85 *B. subtilis* 168 cells to isolate the *Pspac-pbpB* locus, resulting in strain TNVS087 (*Pspac-pbpB*).  
86 Finally, chromosomal DNA of strain TNVS87 was transformed into competent TNVS758,  
87 resulting in strain TNVS783 (*Pxyl-mCherry-zapA Pxyl-sftA-gfp lacA::lacI Pspac-pbpB*).

88 To test whether amino acid residues 30 to 75 were required for recruitment of SftA,  
89 SftA was first fused to GFP by amplifying the *sftA* gene from genomic DNA with primers  
90 TerS279 and TerS280, and linearizing plasmid pMW1 (Müller *et al.*, 2016) with primers  
91 TerS153 and TerS274, followed by Gibson assembly, resulting in plasmid pTNV063 (*Pxyl-sftA-*  
92 *msfgfp*). A truncated variant of SftA comprising the first 149 amino acids was then  
93 constructed. For this plasmid pTNV063 was PCR amplified with primer pairs TerS153 and  
94 TerS145, and TerS203 and TerS146 to yield two separate products. These two products were  
95 Gibson assembled to create plasmid pTNV069 (*Pxyl-sftA(M1-P149)-msfgfp*). Two different  
96 PCR products with plasmid pTNV063 with primer pairs TerS153 and TerS145, and TerS203 and  
97 TerS146, which were Gibson assembled, resulting in plasmid pTNV124 (*Pxyl-sftA(M1-P149)-*  
98 *msfgfp*). Plasmid pTNV124 was transformed to competent cells of TNVS083 (*sftA::erm*)  
99 resulting in strain TNVS456. Next, pTNV069 was also PCR amplified with primer pairs TerS180

100 and TerS342, and TerS179 and TerS341 to give two different products. Gibson assembly of  
101 the two products removed the amino acids Q30 to R75 to yield plasmid pTNV093 (*PxyI-*  
102 *sftA(M1-P149(Δ30-75))-msfgfp*). Plasmid pTNV093 was transformed to competent wild type  
103 cells to result in strain TNVS224, and subsequent transformation of this strain with genomic  
104 DNA from strain TNVS083 (*sftA::erm*) resulted in strain TNVS234.

105 To test whether the amphipathic helix of SftA is sufficient to target the protein to the  
106 membrane, this helix was fused to monomeric GFP. To this end, plasmid pTNV124 (*PxyI-*  
107 *sftA(M1-P149)-msfgfp*) was amplified with primer pairs TerS153 and TerS274, and TerS287  
108 and TerS573, and Gibson assembled to obtain pTNV187 (*PxyI-sftA(M1-E14)-msfgfp*). This  
109 plasmid was transformed into competent wild type cells, resulting in strain TNVS586.

110 To test which early cell division protein is important for SftA recruitment of a SftA  
111 variant lacking the N-terminal amphipathic membrane targeting helix, plasmid pTNV144  
112 (*PxyI-sftA-msfgfp*) was linearized with primer pair TerS274 and TerS282 followed by  
113 subsequent recirculation using Gibson assembly, resulting in pTNV202 (*PxyI-sftAΔ(S2-E14)-*  
114 *msfgfp*). This plasmid was then transformed into competent wild type cells, resulting in strain  
115 TNVS729. To remove wild type *sftA*, genomic DNA of strain BKK29805 (Koo *et al.*, 2017) was  
116 transformed into TNVS729. To evaluate the effect of different cell division proteins,  
117 chromosomal DNA from either strain BFA2863 (*sepF::erm*) (Hamoen *et al.*, 2006), YK206  
118 (*ftsA::erm*) (Ishikawa *et al.*, 2006), LH28 (*ezrA::cat*) (Gamba *et al.*, 2015), or 1356 (*zapA::tet*)  
119 (Feucht and Errington, 2005) was transformed into competent TNVS947 cells, resulting in  
120 strains TNVS949, TNVS950, TNVS951, and TNVS952, respectively.

121 To test whether FtsA is important for SftA recruitment, we constructed a minimal 61  
122 amino acid long N-terminal domain that still showed some cell division localization activity by  
123 PCR amplifying from plasmid pTNV063 (*PxyI-sftA-msfgfp*) using primer pair ZT189 and EKP22  
124 followed by recircularization using Gibson assembly, resulting in plasmid pZH014 (*PxyI-*

125 *sftA(M1-P61)-msfgfp*). pZH014 was transformed into competent *B. subtilis* 168 cells, resulting  
126 in strain TZh029. To remove wild type *sftA*, genomic DNA of strain BKK29805 (Koo *et al.*, 2017)  
127 was transformed into TZh029 resulting in strain TZh035. To label the location of the Z-ring,  
128 we amplified a fragment of *zapA::P<sub>xy</sub>-mcherry-zapA-cat* from strain TNVS758 using primer pair  
129 TerS314 and TerS315, then transformed this into TZh035, resulting in strain TZh119. To  
130 evaluate the effect of a *sepF* or *ftsA* deletions, chromosomal DNA from either strain BFA2863  
131 (*sepF::erm*) (Hamoen *et al.*, 2006) or TB07 (*ftsA::erm*), were transformed into competent  
132 TZh119 cells, resulting in strains TZh120 and TZh121, respectively.

133 To determine the effect of an SftA null mutant on cell division in different cell division  
134 mutants, we first introduced these mutations into the same *B. subtilis* 168 wild type  
135 background. To this end genomic DNA from either a *zapA::tet* (strain 1356 (Feucht and  
136 Errington, 2005)), *sepF::spc* (strain YK204 (Ishikawa *et al.*, 2006)), *ftsA::erm* (strain YK206)  
137 (Ishikawa *et al.*, 2006) or *ezrA::spc* (strain PG049 (Gamba *et al.*, 2015)) strain was used to first  
138 transform *B. subtilis* 168, resulting in strains TNVS193, TNVS159, TNVS281 and TNVS158,  
139 respectively. Subsequently, *sftA* was deleted by introducing *sftA::erm* from TNVS083,  
140 resulting in TNVS197, TNVS152 and TNVS171, respectively. Strain TNVS825 (*sftA::kan*) was  
141 combined with YK206 (*ftsA::erm*) (Ishikawa *et al.*, 2006) to result in strain TNVS869 (*sftA::kan*  
142 *ftsA::erm*).

143 To test whether overexpression of SftA affected cell division in the different cell  
144 division mutants, the *amyE* locus integration plasmid pSG1729 (Lewis and Marston, 1999),  
145 containing a xylose-inducible (P<sub>xy</sub>) *gfp* gene, was PCR amplified to remove the *gfp* gene using  
146 primer pairs TerS261 and TerS146, and TerS262 and TerS145. Ligation with Gibson assembly  
147 resulted in plasmid pTNV061. We encountered some problems with the cloning in *E. coli* of  
148 certain *sftA* containing plasmids, which was bypassed by utilizing a low copy number plasmid.  
149 To achieve this, the low copy number origin pSC101 from plasmid pSEN29 (Genevaux *et al.*,

150 2004) was amplified with primer pair TerS478 and TerS479, to replace the ORI of plasmid  
151 pTNV061 by PCR using primer pair TerS226 and TerS382. The two PCR products were Gibson  
152 assembled to form the low copy number plasmid pTNV122. To introduce the *sftA* gene, the  
153 plasmid was PCR linearized using primer pair TerS263 and TerS274, and the *sftA* gene was  
154 amplified with primer pair TerS279 and TerS357. Gibson assembly of both PCR products  
155 resulted in plasmid pTNV125 (*P<sub>xyl</sub>-sftA*), which was subsequently integrated into the *amyE*  
156 locus of wild type *B. subtilis* 168, resulting in strain TNVS390. TNVS390 was transformed with  
157 chromosomal DNA from strains LH028 (*ezrA::cat*), BFA2863 (*sepF::erm*), 1356 (*zapA::tet*) and  
158 YK206 (*ftsA::erm*), resulting in TNVS591, TNVS605, TNVS606 and TNVS622, respectively.

159 To test the effect of overexpression of the amino acid 1-149 N-terminal domain of SftA  
160 on viability, this fragment was amplified with primer pair TerS279 and AH002 from genomic  
161 DNA of *B. subtilis* 168 and cloned into the *amyE* integration plasmid pTNV143 linearized with  
162 primer pair TerS274 and AH001, using Gibson assembly. The resulting plasmid pTNV166 was  
163 transformed to *B. subtilis* 168, resulting in strain TNVS541 (*P<sub>xyl</sub>-sftA(M1-P149)*). Strain  
164 TNVS541 was transformed with chromosomal DNA of LH028 (Gamba *et al.*, 2015) containing  
165 the *ezrA::cat* deletion resulting in strain TNVS602. The N-terminal domain of SftA was  
166 overproduced by the addition of xylose.

167 To test whether SftA overexpression in  $\Delta ezrA$  cells influenced Z-ring formation or the  
168 recruitment of late cell division proteins, firstly, the spectinomycin marker of strain TNVS390  
169 was replaced with the kanamycin marker of plasmid pYQ29 (unpublished plasmid from Y.  
170 Gao), resulting in strain TNVS608 (*P<sub>xyl</sub>-sftA*). Subsequently, TNVS608 was transformed with  
171 chromosomal DNA from either strain PG62 (*P<sub>spac</sub>-yfp-ftsA*) (Gamba *et al.*, 2009), PG227  
172 (*P<sub>spac</sub>-yfp-pbpB*) (Gamba *et al.*, 2009) or YK203 (*P<sub>spac</sub>-yfp-sepF*) (Ishikawa *et al.*, 2006),  
173 resulting in strains TNVS650, TNVS652 and TNVS708, respectively. These strains were  
174 subsequently transformed with chromosomal DNA from strain LH028 (*ezrA::cat*) (Gamba *et*

175 *al.*, 2015), resulting in the final test strains TNVS650, TNVS652 and TNVS708, respectively.

176 To test the effect of *sftA* and *sepF* deletions on chromosome bisection, strains  
177 TNVS371 (*yneABC::tet*), TNVS089 (*sftA::erm yneABC::tet*), TNVS373 (*sepF::spc yneABC::tet*)  
178 and TNVS431 (*sftA::erm sepF::spc yneABC::tet*) were created by transforming genomic DNA  
179 of strain YK138 (Bohorquez *et al.*, 2018) into strains *B. subtilis* 168, TNVS083 (*sftA::erm*),  
180 TNVS159 (*sepF::spc*) and TNVS152 (*sftA::erm sepF::spc*), respectively.

181 To quantify FtsZ-rings formation over nucleoids strain TNVS354 (*chr::Pxyl-mCherry-*  
182 *zapA sftA::erm*) was constructed by transforming strain EKB036 (kind gift from Edward de  
183 Koning) with chromosomal DNA from TNVS083.

184



185 **Table S1. *B. subtilis* trains used in this study.**

| strain   | genotype                                                                                   | reference                          |
|----------|--------------------------------------------------------------------------------------------|------------------------------------|
| 168      | <i>trpC2</i>                                                                               | (Zeigler <i>et al.</i> , 2008)     |
| DS7996   | <i>lacA::lacI-tet amyE::lacZ-cat</i>                                                       | (Pozsgai <i>et al.</i> , 2011)     |
| BKE29805 | <i>sftA::erm</i>                                                                           | (Koo <i>et al.</i> , 2017)         |
| BKK29805 | <i>sftA::kan</i>                                                                           | (Koo <i>et al.</i> , 2017)         |
| BFA2863  | <i>sepF::erm</i>                                                                           | (Hamoen <i>et al.</i> , 2006)      |
| 3294     | <i>chr::P<sub>divIVA</sub>-gfp-divIVA - cat chr::(P<sub>spac</sub>-pbpB neo)</i>           | (Hamoen and Errington, 2003)       |
| 1801     | <i>chr::(P<sub>spac</sub>-ftsZ ble)</i>                                                    | (Marston <i>et al.</i> , 1998)     |
| 1356     | <i>zapA-yshB::tet</i>                                                                      | (Feucht and Errington, 2005)       |
| EKB036   | <i>chr::(P<sub>xyI</sub>-mCherry-zapA-cat)</i>                                             | Gift from E. de Koning unpublished |
| TB07     | <i>ftsA::erm</i>                                                                           | This work                          |
| LH028    | <i>ezrA::cat</i>                                                                           | (Gamba <i>et al.</i> , 2015)       |
| PG049    | <i>ezrA::spc</i>                                                                           | (Gamba <i>et al.</i> , 2015)       |
| PG062    | <i>aprE3'-spc-P<sub>spac</sub>-yfp-ftsA-aprE5'</i>                                         | (Gamba <i>et al.</i> , 2009)       |
| PG227    | <i>aprE3'-spc-P<sub>spac</sub>-yfp-pbpB-aprE5'</i>                                         | (Gamba <i>et al.</i> , 2009)       |
| TNVS001  | <i>amyE3'-spc-P<sub>xyI</sub>-sftA-gfp-amyE5'</i>                                          | This work                          |
| TNVS042  | <i>amyE3'-P<sub>xyI</sub>-mgfp-ydeL-amyE5'</i>                                             | This work                          |
| TNVS083  | <i>sftA::erm</i> (BKE29805 transformed to 168)                                             | This work                          |
| TNVS087  | <i>chr::(P<sub>spac</sub>-pbpB neo)</i> (3294 transformed to 168)                          | This work                          |
| TNVS089  | <i>sftA::erm yneABC::tet</i>                                                               | This work                          |
| TNVS152  | <i>sftA::erm sepF::spc</i>                                                                 | This work                          |
| TNVS158  | <i>ezrA::spc</i> (PG049 transformed to 168)                                                | This work                          |
| TNVS159  | <i>sepF::spc</i> (YK204 transformed to 168)                                                | This work                          |
| TNVS171  | <i>sftA::erm ezrA::spc</i>                                                                 | This work                          |
| TNVS193  | <i>zapA::tet</i> (1356 transformed to 168)                                                 | This work                          |
| TNVS197  | <i>sftA::erm zapA::tet</i>                                                                 | This work                          |
| TNVS209  | <i>lacA::lacI-tet</i> (DS7996 transformed to 168)                                          | This work                          |
| TNVS224  | <i>amyE3'-spc-P<sub>xyI</sub>-sftA(M1-P149)Δ(Q30-R75)-mgfp-amyE5'</i>                      | This work                          |
| TNVS234  | <i>sftA::erm amyE3'-spc-P<sub>xyI</sub>-sftA(M1-P149)Δ(Q30-R75)-mgfp-amyE5'</i>            | This work                          |
| TNVS248  | <i>ydeL::erm</i> (BKE05240 transformed to 168)                                             | This work                          |
| TNVS254  | <i>amyE3'-spc-P<sub>xyI</sub>-sftA-mgfp-amyE5' sftA::erm ylmFGH::kan</i>                   | This work                          |
| TNVS281  | <i>ftsA::erm P<sub>spac</sub>-ftsZ</i> (YK206 transformed to 168)                          | This work                          |
| TNVS330  | <i>amyE3'-spc-P<sub>xyI</sub>-sftA-mgfp-amyE5' ftsA::erm</i>                               | This work                          |
| TNVS342  | <i>amyE3'-spc-P<sub>xyI</sub>-sftA-mgfp-amyE5' zapA::tet</i>                               | This work                          |
| TNVS343  | <i>amyE3'-spc-P<sub>xyI</sub>-sftA-mgfp-amyE5' ezrA::tet</i>                               | This work                          |
| TNVS353  | <i>chr::(P<sub>xyI</sub>-mCherry-zapA-cat) amyE3'-spc-P<sub>xyI</sub>-sftA-mgfp-amyE5'</i> | This work                          |
| TNVS366  | <i>amyE3'-P<sub>xyI</sub>-mgfp-ydeL-amyE5' ydeL::erm</i>                                   | This work                          |
| TNVS371  | <i>yneABC::tet</i> (YK138 transformed to 168)                                              | This work                          |
| TNVS373  | <i>yneABC::tet sepF::spc</i>                                                               | This work                          |
| TNVS390  | <i>amyE3'-spc-P<sub>xyI</sub>-sftA-amyE5'</i>                                              | This work                          |
| TNVS431  | <i>yneABC::tet sepF::spc sftA::erm</i>                                                     | This work                          |
| TNVS456  | <i>sftA::erm amyE3'-spc-P<sub>xyI</sub>-sftA(M1-P149)-mgfp-amyE5</i>                       | This work                          |
| TNVS541  | <i>amyE3'-spc-P<sub>xyI</sub>-sftA(M1-P149)-His6-amyE5'</i>                                | This work                          |
| TNVS586  | <i>amyE3'-spc-P<sub>xyI</sub>-sftA (M1-E14)-mgfp-amyE5'</i>                                | This work                          |
| TNVS591  | <i>amyE3'-spc-P<sub>xyI</sub>-sftA-amyE5' ezrA::cat</i>                                    | This work                          |
| TNVS602  | <i>amyE3'-spc-P<sub>xyI</sub>-sftA(M1-P149)-2GS-His6-amyE5' ezrA::cat</i>                  | This work                          |
| TNVS605  | <i>amyE3'-spc-P<sub>xyI</sub>-sftA-amyE5' sepF::erm</i>                                    | This work                          |
| TNVS606  | <i>amyE3'-spc-P<sub>xyI</sub>-sftA-amyE5' zapA::tet</i>                                    | This work                          |
| TNVS608  | <i>amyE3'-spc::kan-P<sub>xyI</sub>-sftA-amyE5'</i>                                         | This work                          |
| TNVS622  | <i>amyE3'-spc-P<sub>xyI</sub>-sftA-amyE5' ftsA::erm</i>                                    | This work                          |
| TNVS650  | <i>amyE3'-kan-P<sub>xyI</sub>-sftA-amyE5'- aprE3'-spc-P<sub>spac</sub>-yfp-ftsA-aprE5'</i> | This work                          |
| TNVS652  | <i>amyE3'-kan-P<sub>xyI</sub>-sftA-amyE5'- aprE3'-spc-P<sub>spac</sub>-yfp-sepF-aprE5'</i> | This work                          |
| TNVS708  | <i>amyE3'-kan-P<sub>xyI</sub>-sftA-amyE5'- aprE3'-spc-P<sub>spac</sub>-yfp-pbpB-aprE5'</i> | This work                          |

|         |                                                                                                                                              |                                  |
|---------|----------------------------------------------------------------------------------------------------------------------------------------------|----------------------------------|
| TNVS710 | <i>amyE3'-kan-P<sub>xyI</sub>-sftA-amyE5'- aprE3'-spc-P<sub>spac</sub>-yfp-ftsA-aprE5' ezrA::cat</i>                                         | This work                        |
| TNVS712 | <i>amyE3'-kan-P<sub>xyI</sub>-sftA-amyE5'- aprE3'-spc-P<sub>spac</sub>-yfp-sepF-aprE5' ezrA::cat</i>                                         | This work                        |
| TNVS713 | <i>amyE3'-kan-P<sub>xyI</sub>-sftA-amyE5'- aprE3'-spc-P<sub>spac</sub>-yfp-pbpB-aprE5' ezrA::cat</i>                                         | This work                        |
| TNVS729 | <i>amyE3'-spc-P<sub>xyI</sub>-sftAΔ(S2-L12)-4GS-msfGFP-His6-amyE5'</i>                                                                       | This work                        |
| TNVS758 | <i>chr:::(P<sub>xyI</sub>-mCherry-zapA-cat) cat amyE3'-spc-P<sub>xyI</sub>-sftA-mgfp-amyE5' lacA::lacI-tet</i>                               | This work                        |
| TNVS776 | <i>psdS::erm (BKE34710 transform to 168)</i>                                                                                                 | This work                        |
| TNVS783 | <i>chr:::(P<sub>xyI</sub>-mCherry-zapA-cat) amyE3'-spc-P<sub>xyI</sub>-sftA-mgfp-amyE5' lacA::lacI-tet chr:::(P<sub>spac</sub>-pbpB-neo)</i> | This work                        |
| TNVS786 | <i>chr:::(P<sub>xyI</sub>-mCherry-zapA-cat) amyE3'-spc-P<sub>xyI</sub>-sftA-mgfp-amyE5' lacA::lacI-tet chr:::(P<sub>spac</sub>-ftsZ ble)</i> | This work                        |
| TNVS810 | <i>amyE3'-spc-P<sub>xyI</sub>-psdS-mgfp-amyE5'</i>                                                                                           | This work                        |
| TNVS825 | <i>sftA::kan (BKK29805 transformed to 168)</i>                                                                                               | This work                        |
| TNVS947 | <i>amyE3'-spc-P<sub>xyI</sub>-sftAΔ(S2-L12)-amyE5' sftA::kan</i>                                                                             | This work                        |
| TNVS949 | <i>amyE3'-spc-P<sub>xyI</sub>-sftAΔ(S2-L12)-amyE5' sftA::kan ΔsepF::erm</i>                                                                  | This work                        |
| TNVS950 | <i>amyE3'-spc-P<sub>xyI</sub>-sftAΔ(S2-L12)-amyE5' sftA::kan ΔftsA::erm</i>                                                                  | This work                        |
| TNVS951 | <i>amyE3'-spc-P<sub>xyI</sub>-sftAΔ(S2-L12)-amyE5' sftA::kan ΔezrA::cat</i>                                                                  | This work                        |
| TNVS952 | <i>amyE3'-spc-P<sub>xyI</sub>-sftAΔ(S2-L12)-amyE5' sftA::kan ΔzapA::tet</i>                                                                  | This work                        |
| TZH010  | <i>amyE3'-spc-P<sub>xyI</sub>-msfgfp-sftAΔ(M1-E250)-amyE5'</i>                                                                               | This work                        |
| TZH018  | <i>amyE3'-spc-P<sub>xyI</sub>-msfgfp-sftAΔ(M1-E250)-amyE5' sftA::kan sepF::erm</i>                                                           | This work                        |
| TZH021  | <i>amyE3'-spc-P<sub>xyI</sub>-msfgfp-sftAΔ(M1-E250)-amyE5' sftA::kan</i>                                                                     | This work                        |
| TZH022  | <i>amyE3'-spc-P<sub>xyI</sub>-msfgfp-sftAΔ(M1-E250)-amyE5' sftA::kan ftsA::cat</i>                                                           | This work                        |
| TZH029  | <i>amyE3'-spc-P<sub>xyI</sub>-sftA(M1-P61)-msfgfp-amyE5'</i>                                                                                 | This work                        |
| TZH035  | <i>amyE3'-spc-P<sub>xyI</sub>-sftA(M1-P61)-msfgfp-amyE5' sftA::kan</i>                                                                       | This work                        |
| TZH051  | <i>amyE3'-spc-P<sub>xyI</sub>-sftA(M1-P61)-msfgfp-amyE5' sftA::kan ftsA::cat</i>                                                             | This work                        |
| TZH053  | <i>amyE3'-spc-P<sub>xyI</sub>-sftA(M1-P61)-msfgfp-amyE5' sftA::kan sepF::erm</i>                                                             | This work                        |
| TZH119  | <i>amyE3'-spc-P<sub>xyI</sub>-sftA(M1-P61)-msfgfp-amyE5' chr:::(P<sub>xyI</sub>-mCherry-zapA-cat) sftA::kan</i>                              | This work                        |
| TZH120  | <i>amyE3'-spc-P<sub>xyI</sub>-sftA(M1-P61)-msfgfp-amyE5' chr:::(P<sub>xyI</sub>-mCherry-zapA-cat) sftA::kan ftsA::erm</i>                    | This work                        |
| TZH121  | <i>amyE3'-spc-P<sub>xyI</sub>-sftA(M1-P61)-msfgfp-amyE5' chr:::(P<sub>xyI</sub>-mCherry-zapA-cat) sftA::kan sepF::erm</i>                    | This work                        |
| YK138   | <i>yneABC::tet</i>                                                                                                                           | (Bohorquez <i>et al.</i> , 2018) |
| YK203   | <i>aprE3'-spc-P<sub>spac</sub>-yfp-yImF-aprE5'</i>                                                                                           | (Ishikawa <i>et al.</i> , 2006)  |
| YK204   | <i>sepF::spc</i>                                                                                                                             | (Ishikawa <i>et al.</i> , 2006)  |
| YK206   | <i>ftsA::erm P<sub>spac</sub>-ftsZ</i>                                                                                                       | (Ishikawa <i>et al.</i> , 2006)  |
| GYQ300  | <i>ftsA::cat</i>                                                                                                                             | Kind gift of Y. Gao              |

186 *gfp*, *mgfp* and *msfgfp* indicate green fluorescent protein (GFP), the monomeric and  
187 monomeric super folder variants, respectively. *tet*, *cat*, *spec* and *erm* indicate tetracycline,  
188 chloramphenicol, spectinomycin and erythromycin resistance cassettes, respectively.

189 **Table S2. Plasmids used in this study.**

| plasmid  | relevant genotype                                                                   | reference                       |
|----------|-------------------------------------------------------------------------------------|---------------------------------|
| pET24A   | <i>lacI-T<sub>7</sub>-lacO-kan</i>                                                  | Novagen                         |
| pMW1*    | <i>amyE3'-spc-P<sub>xyI</sub>-MCS-msfgfp-amyE5' bla</i>                             | (Müller <i>et al.</i> , 2016)   |
| pNC12    | <i>P<sub>tac</sub>-malE-sepF</i>                                                    | (Duman <i>et al.</i> , 2013)    |
| pSEN29   | <i>bla Rep101 pSC101 ori</i>                                                        | (Genevaux <i>et al.</i> , 2004) |
| pSG1154  | <i>amyE3'-spc-P<sub>xyI</sub>-mcs-gfp-amyE5' bla</i>                                | (Lewis and Marston, 1999)       |
| pSG1729  | <i>amyE3'-spc-P<sub>xyI</sub>-gfp-mcs-amyE5' bla</i>                                | (Lewis and Marston, 1999)       |
| pTNV001  | <i>amyE3'-spc-P<sub>xyI</sub>-sftA-gfp-amyE5' bla</i>                               | This work                       |
| pTNV022  | <i>amyE3'-spec-P<sub>xyI</sub>-mgfp-ydeL-amyE5' bla</i>                             | This work                       |
| pTNV061  | <i>amyE3'-spec-P<sub>xyI</sub>-MCS-amyE5' bla</i>                                   | This work                       |
| pTNV063  | <i>amyE3'-spc-P<sub>xyI</sub>-sftA-msfgfp-amyE5' bla</i>                            | This work                       |
| pTNV064* | <i>amyE3': spec-P<sub>xyI</sub>-MCS-msfgfp-amyE5' bla</i>                           | This work                       |
| pTNV069  | <i>amyE3': spec-P<sub>xyI</sub>-sftA(M1-P149)-msfgfp-amyE5' bla</i>                 | This work                       |
| pTNV082  | <i>lacI-T<sub>7</sub>-lacO-sftA-His<sub>6</sub>-kan</i>                             | This work                       |
| pTNV093  | <i>amyE3': spec-P<sub>xyI</sub>-sftA(M1-P149)Δ(Q30-R75)-mgfp-amyE5' bla</i>         | This work                       |
| pTNV100  | <i>amyE3'-spec-P<sub>xyI</sub>-msfgfp-MCS-amyE5' bla</i>                            | This work                       |
| pTNV122  | <i>amyE3'-spec-P<sub>xyI</sub>-MCS-amyE5' bla Rep101 pSC101 ori</i>                 | This work                       |
| pTNV124  | <i>amyE3': spec-P<sub>xyI</sub>-sftA(M1-P149)-msfgfp-His<sub>6</sub>-amyE5' bla</i> | This work                       |
| pTNV125  | <i>amyE3'-spec-P<sub>xyI</sub>-sftA-amyE5' bla Rep101 pSC101 ori</i>                | This work                       |
| pTNV143  | <i>amyE3': spec-P<sub>xyI</sub>-msfgfp-His<sub>6</sub>-amyE5' bla</i>               | This work                       |
| pTNV144  | <i>amyE3'-spc-P<sub>xyI</sub>-sftA-msfgfp-His<sub>6</sub>-amyE5' bla</i>            | This work                       |
| pTNV166  | <i>amyE3': spec-P<sub>xyI</sub>-sftA(M1-P149)-His<sub>6</sub>-amyE5' bla</i>        | This work                       |
| pTNV187  | <i>amyE3': spec-P<sub>xyI</sub>-sftA(M1-E14)-His<sub>6</sub>-amyE5' bla</i>         | This work                       |
| pTNV202  | <i>amyE3': spec-P<sub>xyI</sub>-sftAΔ(S2-L12)-msfgfp-His<sub>6</sub>-amyE5' bla</i> | This work                       |
| pZH008   | <i>amyE3'-spc-P<sub>xyI</sub>-msfgfp-sftAΔ(M1-E250)-amyE5' bla</i>                  | This work                       |
| pZH014   | <i>amyE3'-spc-P<sub>xyI</sub>-sftA(M1-P61)-msfgfp-amyE5' bla</i>                    | This work                       |
| pYQ29    | <i>spc::kan bla</i>                                                                 | Kind gift of Y. Gao             |

190 \* the MCS of plasmid pMW1 adds two amino acids to the fused protein.

191 *gfp*, *mgfp* and *msfgfp* indicate green fluorescent protein (GFP), the monomeric and  
 192 monomeric super folder variants, respectively. *tet*, *cat*, *spec* and *erm* indicate tetracycline,  
 193 chloramphenicol, spectinomycin and erythromycin resistance cassettes, respectively. *mcs*  
 194 indicates multiple cloning site.

| primer  | sequence 5'→3'                                                            |
|---------|---------------------------------------------------------------------------|
| AH001   | GGCTCAGGAAGCCATCATCACCATCACCCTAG                                          |
| AH002   | TGATGATGGCTTCTGAGCCCGTTCTTCAATGTTTCAGAAGGCT                               |
| TerS001 | GGGGGGGGGCCCATGAGTTGGCTTCATAAAT                                           |
| TerS002 | CCCCGAATTCGATCCTGAGCCGCTTCTGAGCCTTCGTTTATTAATCAC                          |
| TerS127 | GGGCTCGAGGGCTCAGGAAGCGGCTCAGGATCCGATATCACGCCTTTTTGAATAGA                  |
| TerS128 | CCCGCGGCCGCCTCATATCTTCCAGGCAGCCTTCA                                       |
| TerS145 | ATAAACAAATAGGGGTTCCGCGCA                                                  |
| TerS146 | TGCGCGGAACCCCTATTTGTTTAT                                                  |
| TerS153 | GGCTCAGGAAGCGGCTCAGGATCCAGTAAAGGAGAAGAACT                                 |
| TerS179 | CGCACACCATCGGACGAACCGA                                                    |
| TerS180 | GGTTCGTCCGATGGTGTGCGCGGAATTTGAGCGGGTTTTGTCT                               |
| TerS203 | CCTGAGCCGCTTCTGAGCCCGTTCTGTTCAATGTTTCA                                    |
| TerS226 | GGGGAAGGCCATCCAGCCTCGCGT                                                  |
| TerS261 | TGGATCCGAAGTCTGGACATCTGCAGGGTACCCATCCTAGGA                                |
| TerS262 | ATGTCCAGACTTCGGATCCA                                                      |
| TerS263 | CAATTCTAGTTCTAGAGCGGCCGCGA                                                |
| TerS274 | CATCCTAGGAATCTCCTTTCTAGA                                                  |
| TerS279 | GAAAGGAGATTCTAGGATGAGTTGGCTTCATAAATTTTTTGA                                |
| TerS280 | CCTGAGCCGCTTCTGAGCCTTCGTTTATTAATCACTTGCT                                  |
| TerS282 | GAAAGGAGATTCTAGGATGGGCGAAAGCGAAGAGGATGCTGA                                |
| TerS283 | TTTGTAGAGCTCATCCATGCCATGTGT                                               |
| TerS287 | CTGTAGACAAATTGTGAAAGGAT                                                   |
| TerS341 | CGCGGTCATCAATCATACCACCA                                                   |
| TerS342 | TGGTATGATTGATGACCGCGTCA                                                   |
| TerS357 | CCGCTCTAGAAGTAGAATTGTTATTCGTTTATTAATCACTTGCTGTGA                          |
| TerS368 | GGCTCAGGAAGCGGCTCAGGATCCAAAGGAGAAGAACTTTTCACTGGAGT                        |
| TerS382 | CAAAAAGGATCTTACCTAGATCCT                                                  |
| TerS413 | GAAAGGAGATTCTAGGATGAGCAAAGGAGAAGAACTTTTCACT                               |
| TerS414 | GCATGGATGAGCTCTACAAAGGCTCAGGAAGCGGCTCAGGATCCTCCAGACTTCGGATCCACGGGCCCCCCCT |
| TerS478 | AGGATCTAGGTGAAGATCCTTTTTGCACCGTTTTTTCATCTGTGCATATGGA                      |
| TerS479 | CGCGACGCGAGGCTGGATGGCCTTCCCCAT                                            |
| TerS484 | GGCATGGATGAGCTCTACAAAGGCTCAGGAAGCCATCATCACCATCACCCTAGATGTCCAGACTTCAGATCCA |
| TerS573 | CCTGAGCCGCTTCTGAGCCTTCGCCTAAAAACAAATCAAAAAATTTATGAAGCCA                   |
| TerS621 | GAAAGGAGATTCTAGGATGTTAAAGACTTATCTCATCGACCGCT                              |
| TerS622 | CCTGAGCCGCTTCTGAGCCCAATGCTGTACATTACAGAGGGTGT                              |
| ZT059   | AAGGCTCAGGAAGCGGCTCAATGCTCACAGATACGGCGGC                                  |
| ZT060   | AGCTTATCGATACCGTCGACTTATTCGTTTATTAATCACTTGCTGTG                           |
| ZT088   | TCTAGAAAGGAGATTCTAGGATGAGTTGGCTTCATAAATTTTTGATTG                          |
| ZT089   | ATTGAGCCGCTTCTGAGCCTGGAAAACGGAATTTGCCTTTTG                                |
| ZT189   | CCTAGGAATCTCCTTTCTAGATGC                                                  |
| ZT200   | TGAGCCGCTTCTGAGCCTTTGTAGAGCTCATCCATGCC                                    |
| EKP22   | GTCGACGGTATCGATAAGCTTGAT                                                  |

197 **Fig. S1**

198

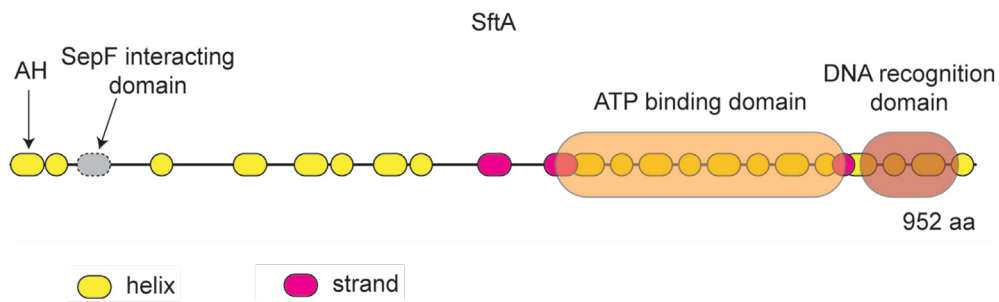

199

200

201 **Fig. S1 Secondary structure prediction of SftA using PSIPred.**

202 Secondary structure analysis was performed using PSIPred (Jones et al. 1999). The cartoon  
203 depicts the main predicted alpha helices (helix), beta strands (strand) and the putative ATP  
204 binding domain and DNA binding domain of SftA. The putative SepF interacting domain of  
205 SftA (amino acids P61-R75 ) found in the yeast two-hybrid analysis is indicated in grey, and  
206 the membrane-binding amphipathic helix is indicated as AH.

207

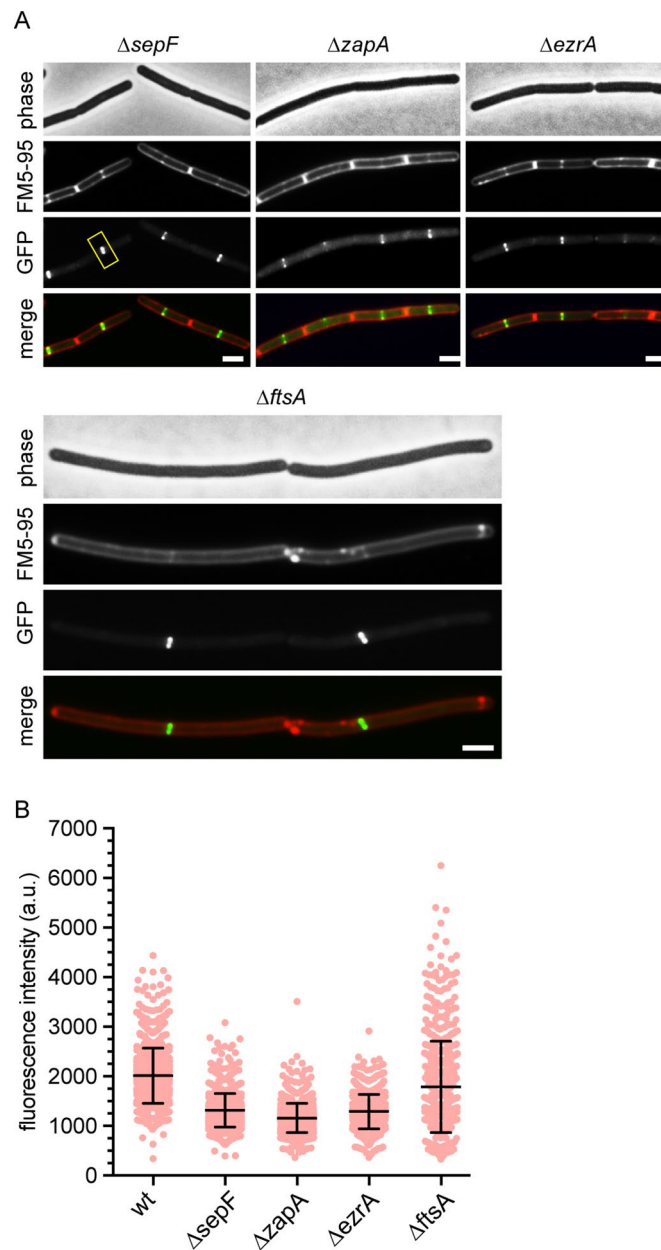

209

210

211 **Fig. S2. Localization of SftA in different cell division mutants.**

212 (A) Fluorescence microscopy images of SftA-GFP in different *B. subtilis* cell division mutants.

213 SftA-GFP expression was induced with 0.1 % xylose. Membranes were stained with FM5-95.

214 Scale bars are 2  $\mu$ m. (B) Scatter plot indicating the SftA-GFP fluorescence intensities at cell

215 division sites (yellow box in A) of the different mutants. On average 500 cells were measured.

216 Strains used: TNVS001, TNVS254, TNVS342, TNVS343 and TNVS330, respectively.

217

218 **Fig. S3**

219

220

221

222

223

224

225

226

227

228

229

230

231

232

233

234

235

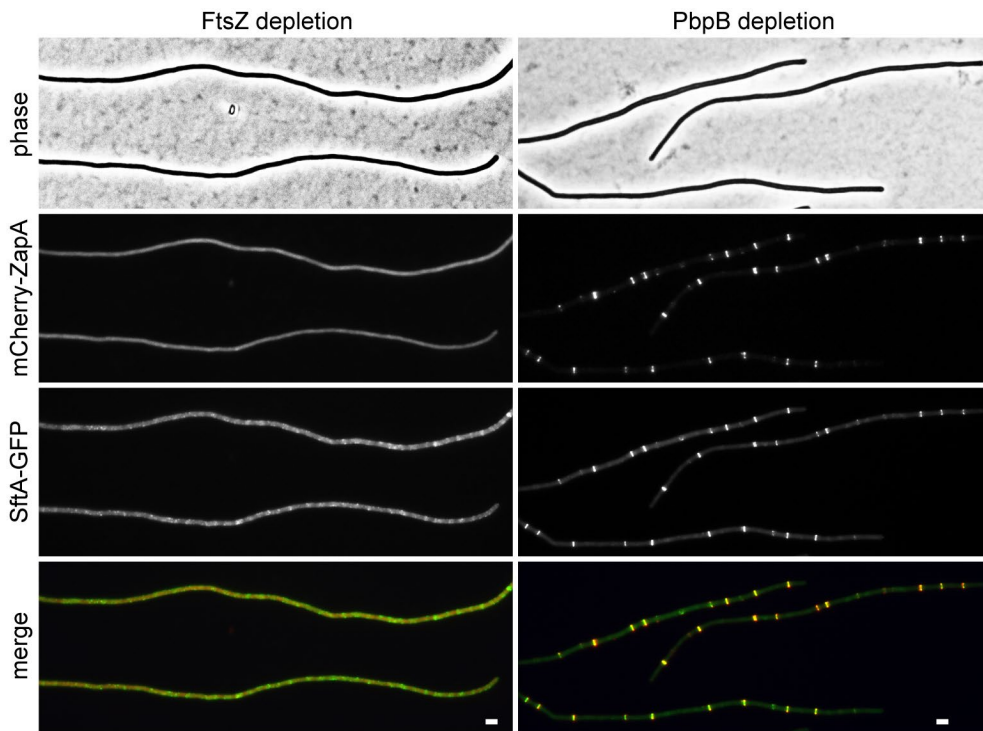

236 **Fig. S3. SftA recruitment does not depend on late cell division proteins.**

237 Localization of SftA-GFP and mCherry-ZapA in cells containing either an IPTG-inducible *ftsZ*

238 (left panels) or *pbp2B* gene (right panels). Cells were grown for 3 h in the absence of IPTG

239 resulting in filamentation. In the absence of Pbp2B, Z-rings are still being formed. SftA-GFP

240 and mCherry-ZapA were induced with 0.1 % xylose. Scale bars are 2  $\mu$ m. Strains used:

241 TNVS783 and TNVS786, respectively.

242

243 **Fig. S4**  
244

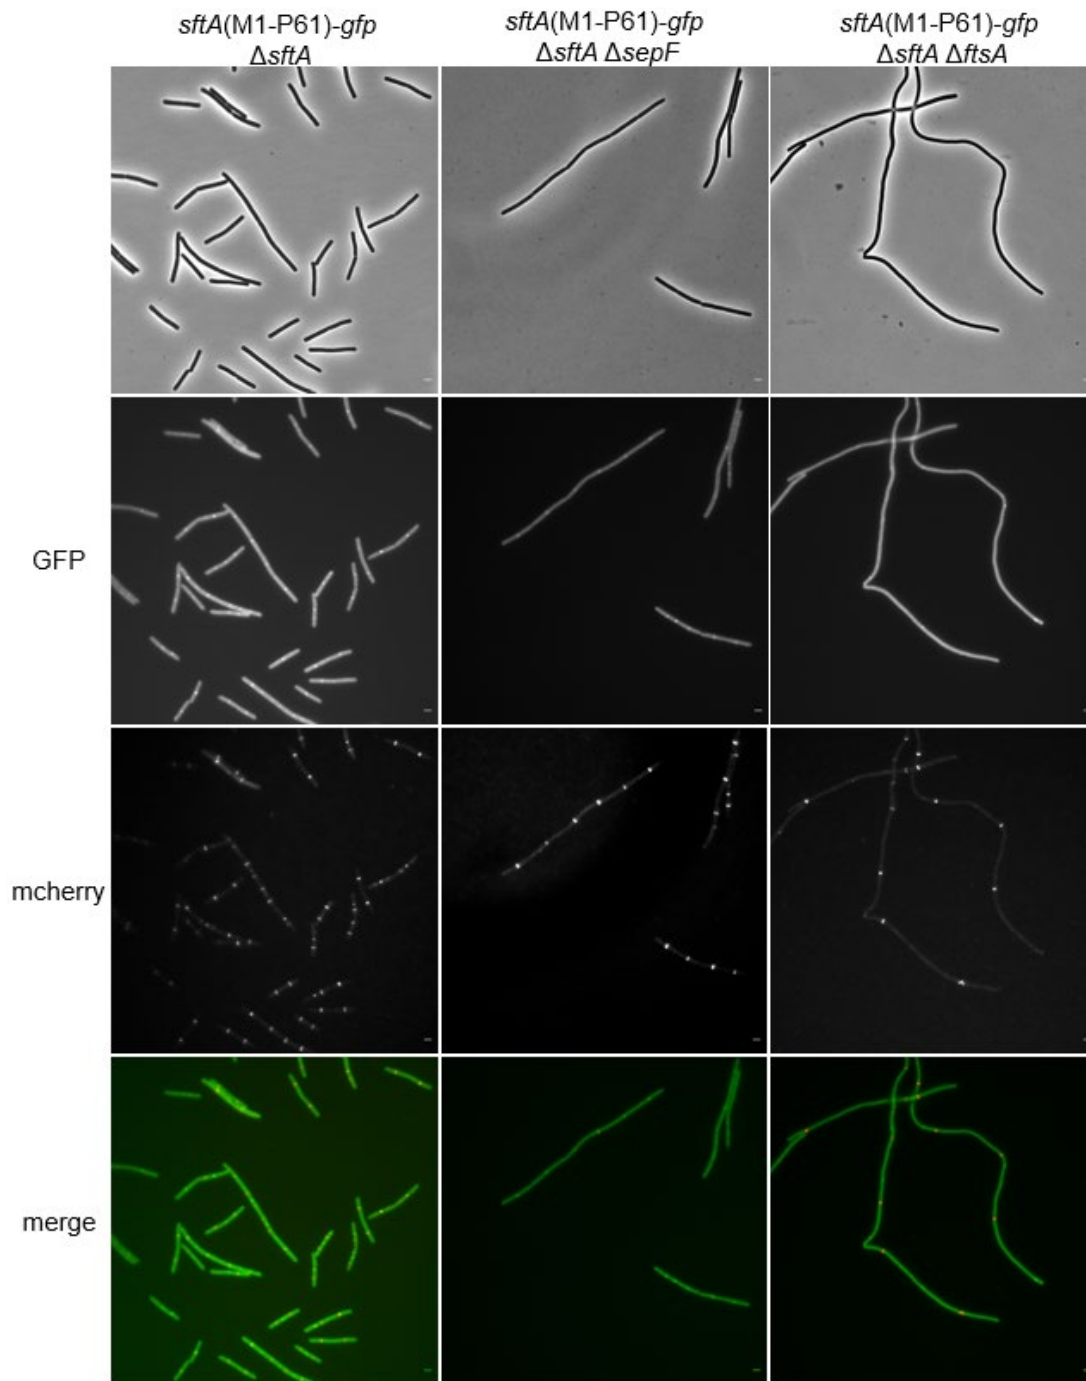

273

274 **Fig. S4. Large field microscopy images of mutants shown in Fig. 5.**

275 Large field images related to main text Fig. 5. Localization of GFP fused to the first 61 amino  
276 acids of SftA (green) in different *B. subtilis* mutants. All strains lacked wild type *sftA*, and all  
277 strains contained an mCherry-ZapA fusion (red) to indicate the localization of Z-rings.  
278 Expression of the fusion proteins was induced with 0.1 % xylose. Scale bars are 2 μm. Strains  
279 used, TZH029, TZH119, TZH120, TZH121, respectively.



280 **Fig. S5**

281

282

283

284

285

286

287

288

289

290

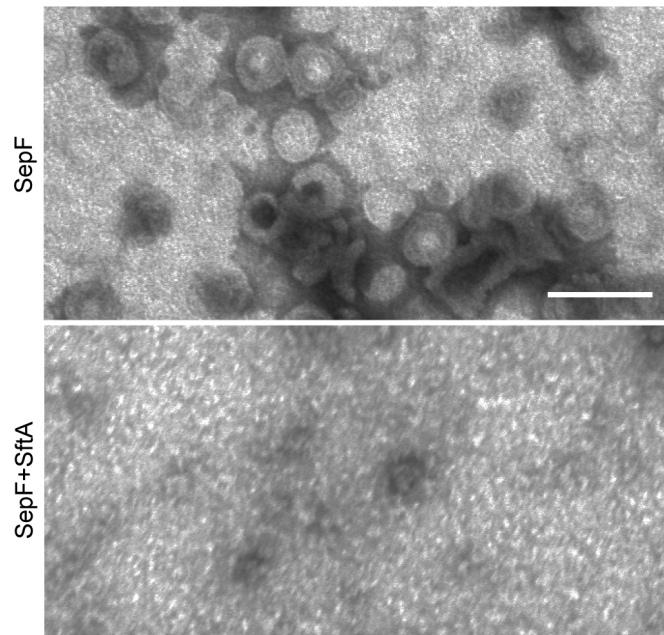

291 **Fig. S5. SftA inhibits SepF ring formation.**

292 SepF forms large protein rings with a diameter of approximately 50 nm (top EM image), after  
293 cleavage of the MBP (Maltose binding protein) moiety from the purified MBP-SepF fusion by  
294 factor Xa. The formation of these rings is inhibited when the cleavage reaction is carried out  
295 in the presence of SftA at a molar ratio of MBP-SepF:SftA of 3:1. Scale bar is 100 nm.

296

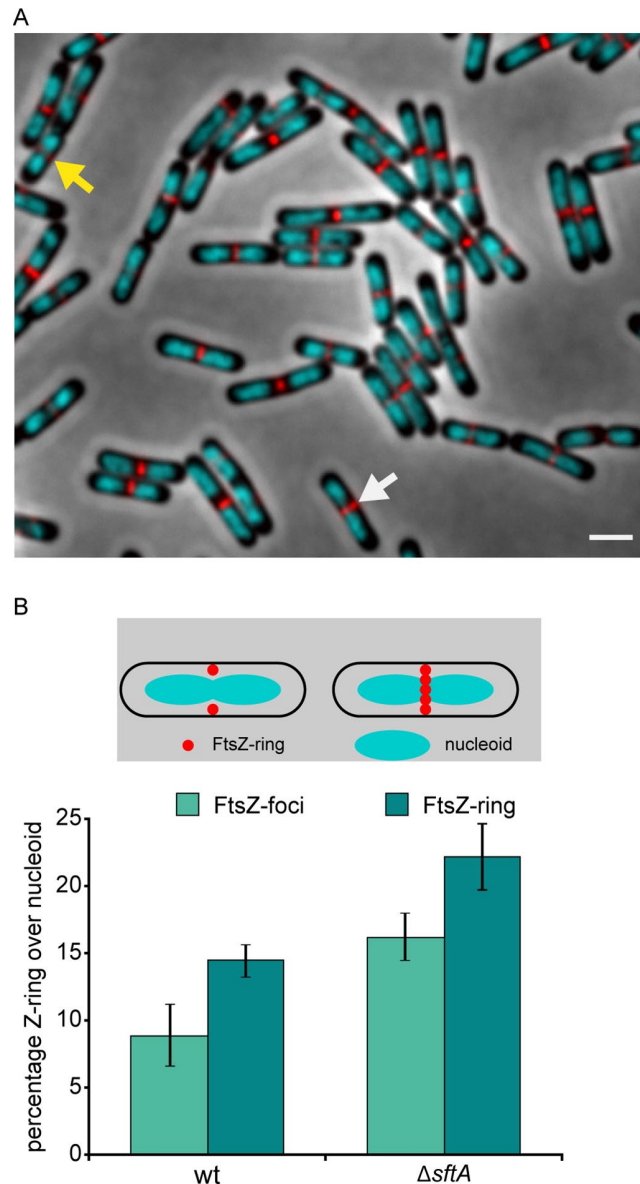

298

299 **Fig. S6. Assembly of FtsZ-rings over nucleoids.**

300 (A)  $\Delta sftA$  cells expressing mCherry-ZapA (red) as FtsZ-ring marker with nucleoids (turquoise)  
 301 stained with DAPI. The start of a Z-ring can be observed in microscopic images by the  
 302 formation of two opposite red fluorescence foci at midcell (yellow arrow). Over time the Z-  
 303 ring becomes more intense and septum synthesis begins resulting in a clear fluorescent band  
 304 (white arrow) that eventually becomes smaller, since the Z-ring forms the leading edge of the  
 305 closing septal wall. Scale bar is 2  $\mu$ m. (B) Bar diagram indicating the average localization of  
 306 early FtsZ foci and Z-rings over nucleoids, based on 3 independent biological experiments  
 307 (approximately 100 cells counted). Cartoon above the bar diagram illustrates how FtsZ-rings  
 308 over nucleoids were scored. Standard errors are indicated. Strains used: TNVS354 and  
 309 EKB036.

310 **References**

311

312 Bohorquez, L.C., Surdova, K., Jonker, M.J., and Hamoen, L.W. (2018) The Conserved DNA  
313 Binding Protein WhiA Influences Chromosome Segregation in *Bacillus subtilis*. *J Bacteriol*  
314 200.

315 Duman, R., Ishikawa, S., Celik, I., Strahl, H., Ogasawara, N., Troc, P., *et al.* (2013) Structural  
316 and genetic analyses reveal the protein SepF as a new membrane anchor for the Z ring. *Proc*  
317 *National Acad Sci* 110: E4601–E4610.

318 Feucht, A., and Errington, J. (2005) *ftsZ* mutations affecting cell division frequency,  
319 placement and morphology in *Bacillus subtilis*. *Microbiology+* 151: 2053–2064.

320 Gamba, P., Rietkötter, E., Daniel, R.A., and Hamoen, L.W. (2015) Tetracycline  
321 hypersensitivity of an *ezrA* mutant links GalE and TseB (YpmB) to cell division. *Front*  
322 *Microbiol* 6: 346.

323 Gamba, P., Veening, J.-W., Saunders, N.J., Hamoen, L.W., and Daniel, R.A. (2009) Two-Step  
324 Assembly Dynamics of the *Bacillus subtilis* Divisome. *J Bacteriol* 191: 4186–4194.

325 Genevoux, P., Keppel, F., Schwager, F., Langendijk-Genevoux, P.S., Hartl, F.U., and  
326 Georgopoulos, C. (2004) In vivo analysis of the overlapping functions of DnaK and trigger  
327 factor. *Embo Rep* 5: 195–200.

328 Gibson, D.G., Young, L., Chuang, R.-Y., Venter, J.C., Hutchison, C.A., and Smith, H.O. (2009)  
329 Enzymatic assembly of DNA molecules up to several hundred kilobases. *Nat Methods* 6:  
330 343–345.

331 Hamoen, L.W., and Errington, J. (2003) Polar Targeting of DivIVA in *Bacillus subtilis* Is Not  
332 Directly Dependent on FtsZ or PBP 2B. *J Bacteriol* 185: 693–697.

333 Hamoen, L.W., Meile, J., Jong, W.D., Noirot, P., and Errington, J. (2006) SepF, a novel FtsZ-  
334 interacting protein required for a late step in cell division. *Mol Microbiol* 59: 989–999.

335 Ishikawa, S., Kawai, Y., Hiramatsu, K., Kuwano, M., and Ogasawara, N. (2006) A new FtsZ-  
336 interacting protein, YlmF, complements the activity of FtsA during progression of cell  
337 division in *Bacillus subtilis*. *Mol Microbiol* 60: 1364–1380.

338 Jones, D.T. (1999) Protein secondary structure prediction based on position-specific scoring  
339 matrices1 1Edited by G. Von Heijne. *J Mol Biol* 292: 195–202.

340 Koo, B.-M., Kritikos, G., Farelli, J.D., Todor, H., Tong, K., Kimsey, H., *et al.* (2017) Construction  
341 and Analysis of Two Genome-Scale Deletion Libraries for *Bacillus subtilis*. *Cell Syst* 4: 291-  
342 305.e7.

343 Lewis, P.J., and Marston, A.L. (1999) GFP vectors for controlled expression and dual labelling  
344 of protein fusions in *Bacillus subtilis*. *Gene* 227: 101–109.

- 345 Marston, A.L., Thomaidis, H.B., Edwards, D.H., Sharpe, M.E., and Errington, J. (1998) Polar  
346 localization of the MinD protein of *Bacillus subtilis* and its role in selection of the mid-cell  
347 division site. *Gene Dev* 12: 3419–3430.
- 348 Müller, A., Wenzel, M., Strahl, H., Grein, F., Saaki, T.N.V., Kohl, B., *et al.* (2016) Daptomycin  
349 inhibits cell envelope synthesis by interfering with fluid membrane microdomains. *Proc*  
350 *National Acad Sci* 113: E7077–E7086.
- 351 Pozsgai, E.R., Blair, K.M., and Kearns, D.B. (2011) Modified mariner Transposons for Random  
352 Inducible-Expression Insertions and Transcriptional Reporter Fusion Insertions in *Bacillus*  
353 *subtilis*. *Appl Environ Microb* 78: 778–785.
- 354 Zeigler, D.R., Prágai, Z., Rodriguez, S., Chevreux, B., Muffler, A., Albert, T., *et al.* (2008) The  
355 Origins of 168, W23, and Other *Bacillus subtilis* Legacy Strains. *J Bacteriol* 190: 6983–6995.
- 356
